# Supplementary material for: Geometric Accuracy of 3D Reality Mesh Utilization for BIM-Based Earthwork Quantity Estimation Workflows
Source: MDPI journal article supplement (doi:10.3390/ijgi10060399), 2021-06-09
Supplement: s1 [file s1]

# Geometric Accuracy of 3D Reality Mesh Utilization for BIM-Based Earthwork Quantity Estimation Workflows

Paulius Kavaliauskas \*, Daumantas Židanavičius and Andrius Jurelionis

Faculty of Civil Engineering and Architecture, Kaunas University of Technology, 44249 Kaunas,

Lithuania; daumantas.zidanavicius@ktu.edu (D.Ž.); andrius.jurelionis@ktu.lt (A.J.)

\* Correspondence: pa.kavaliauskas@ktu.edu

Tables S1-S6 illustrate the coordinates of the control points obtained from the reality mesh models and processed using different configurations. Table S7 presents the GCPs and CHPs RMSE values using the main PPK and GCPs-based methods. Tables S8-S11 show the differences in vertical reference points obtained using ground level manual GNSS and UAV-based methods. Figures S1-S3 show the examples of the boundaries used for stockpiles volume comparison.

Table S1. Control points measurement information. UAV-based PPK method.

| CP No | PPK 74 m Height    |                   |                     | PPK 100 m Height   |                   |                     |
|-------|--------------------|-------------------|---------------------|--------------------|-------------------|---------------------|
|       | Northing, (Meters) | Easting, (Meters) | Elevation, (Meters) | Northing, (Meters) | Easting, (Meters) | Elevation, (Meters) |
| 1     | 6050236.696        | 556234.219        | 162.697             | 6050236.752        | 556234.249        | 162.724             |
| 2     | 6050043.456        | 555982.113        | 159.573             | 6050043.478        | 555982.139        | 159.579             |
| 3     | 6049904.378        | 555953.411        | 159.510             | 6049904.373        | 555953.436        | 159.460             |
| 4     | 6050013.165        | 556105.786        | 157.799             | 6050013.171        | 556105.800        | 157.762             |
| 5     | 6049966.746        | 556230.242        | 156.084             | 6049966.726        | 556230.275        | 156.055             |
| 6     | 6049781.309        | 556206.621        | 155.860             | 6049781.303        | 556206.684        | 155.842             |
| 7     | 6049821.211        | 556140.154        | 152.685             | 6049821.197        | 556140.191        | 152.668             |
| 8     | 6049656.276        | 556080.618        | 157.861             | 6049656.275        | 556080.672        | 157.910             |
| 9     | 6049755.714        | 556125.178        | 157.182             | 6049755.711        | 556125.228        | 157.192             |
| 10    | 6049807.233        | 556330.654        | 158.182             | 6049807.213        | 556330.702        | 158.179             |
| 11    | 6049985.560        | 556330.067        | 155.380             | 6049985.523        | 556330.130        | 155.386             |

Table S2. Control points measurement information. UAV 5 GCPs-based method.

| CP No | 5 GCPs-Based 74 m Height |                      |                        | 5 GCPs-Based 100 m Height |                      |                        |
|-------|--------------------------|----------------------|------------------------|---------------------------|----------------------|------------------------|
|       | Northing,<br>(Meters)    | Easting,<br>(Meters) | Elevation,<br>(Meters) | Northing,<br>(Meters)     | Easting,<br>(Meters) | Elevation,<br>(Meters) |
| 1     | 6050236.701              | 556234.259           | 162.677                | 6050236.703               | 556234.255           | 162.695                |
| 2     | 6050043.431              | 555982.135           | 159.570                | 6050043.445               | 555982.142           | 159.573                |
| 3     | 6049904.347              | 555953.455           | 160.203                | 6049904.398               | 555953.411           | 159.576                |
| 4     | 6050013.147              | 556105.792           | 157.605                | 6050013.142               | 556105.785           | 158.040                |
| 5     | 6049966.716              | 556230.287           | 156.121                | 6049966.718               | 556230.279           | 156.137                |
| 6     | 6049781.295              | 556206.677           | 155.624                | 6049781.339               | 556206.672           | 155.742                |
| 7     | 6049821.185              | 556140.202           | 152.521                | 6049821.195               | 556140.210           | 152.157                |
| 8     | 6049656.238              | 556080.624           | 158.929                | 6049656.314               | 556080.621           | 157.359                |
| 9     | 6049755.709              | 556125.182           | 157.224                | 6049755.715               | 556125.199           | 157.216                |
| 10    | 6049807.246              | 556330.677           | 158.159                | 6049807.246               | 556330.668           | 158.172                |
| 11    | 6049985.544              | 556330.127           | 155.877                | 6049985.514               | 556330.097           | 155.030                |

Table S3. Control points measurement information. UAV 6 GCPs-based method.

| CP No | 6 GCPs-Based 74 m Height |                      |                        | 6 GCPs-Based 100 m Height |                      |                        |
|-------|--------------------------|----------------------|------------------------|---------------------------|----------------------|------------------------|
|       | Northing,<br>(Meters)    | Easting,<br>(Meters) | Elevation,<br>(Meters) | Northing,<br>(Meters)     | Easting,<br>(Meters) | Elevation,<br>(Meters) |
| 1     | 6050236.703              | 556234.257           | 162.682                | 6050236.702               | 556234.258           | 162.662                |
| 2     | 6050043.401              | 555982.133           | 159.564                | 6050043.416               | 555982.138           | 159.568                |
| 3     | 6049904.338              | 555953.413           | 159.466                | 6049904.337               | 555953.408           | 159.470                |
| 4     | 6050013.119              | 556105.788           | 157.800                | 6050013.141               | 556105.774           | 157.859                |
| 5     | 6049966.712              | 556230.288           | 156.132                | 6049966.716               | 556230.277           | 156.127                |
| 6     | 6049781.313              | 556206.672           | 155.885                | 6049781.325               | 556206.649           | 155.884                |
| 7     | 6049821.194              | 556140.204           | 152.703                | 6049821.186               | 556140.210           | 152.710                |
| 8     | 6049656.282              | 556080.681           | 157.989                | 6049656.304               | 556080.611           | 157.780                |
| 9     | 6049755.708              | 556125.191           | 157.224                | 6049755.716               | 556125.198           | 157.207                |
| 10    | 6049807.247              | 556330.669           | 158.166                | 6049807.246               | 556330.669           | 158.156                |
| 11    | 6049985.528              | 556330.110           | 155.434                | 6049985.526               | 556330.097           | 155.432                |

Table S4. Control points measurement information. UAV 8 GCPs-based method.

| CP No | 8 GCPs-Based 74 m Height |                      |                        | 8 GCPs-Based 100 m Height |                      |                        |
|-------|--------------------------|----------------------|------------------------|---------------------------|----------------------|------------------------|
|       | Northing,<br>(Meters)    | Easting,<br>(Meters) | Elevation,<br>(Meters) | Northing,<br>(Meters)     | Easting,<br>(Meters) | Elevation,<br>(Meters) |
| 1     | 6050236.699              | 556234.258           | 162.679                | 6050236.704               | 556234.254           | 162.675                |
| 2     | 6050043.434              | 555982.142           | 159.577                | 6050043.441               | 555982.154           | 159.579                |
| 3     | 6049904.342              | 555953.412           | 159.458                | 6049904.349               | 555953.422           | 159.472                |
| 4     | 6050013.147              | 556105.800           | 157.815                | 6050013.139               | 556105.798           | 157.828                |
| 5     | 6049966.713              | 556230.268           | 156.177                | 6049966.717               | 556230.265           | 156.117                |
| 6     | 6049781.310              | 556206.653           | 155.912                | 6049781.311               | 556206.665           | 155.880                |
| 7     | 6049821.187              | 556140.182           | 152.685                | 6049821.183               | 556140.187           | 152.702                |
| 8     | 6049656.300              | 556080.641           | 157.841                | 6049656.298               | 556080.604           | 157.816                |
| 9     | 6049755.698              | 556125.177           | 157.328                | 6049755.715               | 556125.197           | 157.209                |
| 10    | 6049807.246              | 556330.677           | 158.165                | 6049807.248               | 556330.670           | 158.170                |
| 11    | 6049985.536              | 556330.092           | 155.433                | 6049985.525               | 556330.099           | 155.437                |

Table S5. Control points measurement information. UAV GCPs-based RTK method.

| CP No | 3 GCPs-Based RTK 100 m Height |                   |                     | 5 GCPs-Based RTK 100 m Height |                   |                     |
|-------|-------------------------------|-------------------|---------------------|-------------------------------|-------------------|---------------------|
|       | Northing, (Meters)            | Easting, (Meters) | Elevation, (Meters) | Northing, (Meters)            | Easting, (Meters) | Elevation, (Meters) |
| 1     | 6050236.690                   | 556234.246        | 162.669             | 6050236.694                   | 556234.252        | 162.662             |
| 2     | 6050043.439                   | 555982.150        | 159.571             | 6050043.437                   | 555982.150        | 159.567             |
| 3     | 6049904.355                   | 555953.417        | 159.453             | 6049904.367                   | 555953.425        | 159.474             |
| 4     | 6050013.145                   | 556105.796        | 157.833             | 6050013.153                   | 556105.805        | 157.832             |
| 5     | 6049966.687                   | 556230.258        | 156.091             | 6049966.733                   | 556230.267        | 156.106             |
| 7     | 6049821.181                   | 556140.163        | 152.662             | 6049821.191                   | 556140.180        | 152.691             |
| 10    | 6049807.179                   | 556330.666        | 158.162             | 6049807.236                   | 556330.617        | 158.256             |
| 11    | 6049985.532                   | 556330.113        | 155.412             | 6049985.539                   | 556330.116        | 155.421             |

Table S6. Control points measurement information for smaller-scale PPK survey. Separate measurements were obtained using GNSS receiver.

| CP No | GNSS Receiver Ground Level |                   |                     | PPK 100 m Height   |                   |                     |
|-------|----------------------------|-------------------|---------------------|--------------------|-------------------|---------------------|
|       | Northing, (Meters)         | Easting, (Meters) | Elevation, (Meters) | Northing, (Meters) | Easting, (Meters) | Elevation, (Meters) |
| 1     | 6050066.107                | 556169.741        | 156.523             | 6050066.145        | 556169.744        | 156.482             |
| 2     | 6049871.842                | 556259.675        | 154.222             | 6049871.845        | 556259.67         | 154.190             |
| 3     | 6049722.953                | 556182.283        | 156.363             | 6049722.97         | 556182.271        | 156.348             |
| 4     | 6049730.563                | 556176.176        | 155.965             | 6049730.576        | 556176.162        | 155.978             |
| 5     | 6049910.055                | 556146.170        | 152.203             | 6049910.095        | 556146.167        | 152.187             |

Table S7. RMSE values for 11 control points.

| Method                  | Ground Control Points |       |       | Check Points |       |       |
|-------------------------|-----------------------|-------|-------|--------------|-------|-------|
|                         | X (m)                 | Y (m) | Z (m) | X (m)        | Y (m) | Z (m) |
| 1 known point PPK 74 m  | 0.013                 | 0.016 | 0.000 | 0.023        | 0.029 | 0.028 |
| 1 known point PPK 100 m | 0.019                 | 0.002 | 0.037 | 0.027        | 0.025 | 0.038 |
| 6 GCPs-based GPS 74 m   | 0.04                  | 0.09  | 0.018 | 0.026        | 0.028 | 0.071 |
| 6 GCPs-based GPS 100 m  | 0.01                  | 0.07  | 0.012 | 0.022        | 0.020 | 0.043 |
| 5 GCPs-based GPS 74 m   | 0.008                 | 0.018 | 0.237 | 0.023        | 0.017 | 0.547 |
| 5 GCPs-based GPS 100 m  | 0.004                 | 0.003 | 0.022 | 0.035        | 0.015 | 0.346 |
| 8 GCPs-based GPS 74 m   | 0.005                 | 0.008 | 0.016 | 0.018        | 0.014 | 0.085 |
| 8 GCPs-based GPS 100 m  | 0.007                 | 0.009 | 0.023 | 0.016        | 0.008 | 0.014 |

Table S8. Vertical reference point differences obtained through manual GNSS and UAV-based PPK methods.

| CP<br>No | Vertical Datum Measurements in Meters Obtained Through Manual GNSS and UAV-based PPK Methods. |             |                                 |              |                                 |
|----------|-----------------------------------------------------------------------------------------------|-------------|---------------------------------|--------------|---------------------------------|
|          | GNSS Receiver                                                                                 |             | PPK                             |              | PPK                             |
|          | Ground Level                                                                                  | 74 m Height | Difference from<br>Ground Level | 100 m Height | Difference from<br>Ground Level |
| 1        | 162.661                                                                                       | 162.697     | -0.036                          | 162.724      | -0.063                          |
| 2        | 159.556                                                                                       | 159.573     | -0.017                          | 159.579      | -0.023                          |
| 3        | 159.463                                                                                       | 159.510     | -0.047                          | 159.460      | 0.003                           |
| 4        | 157.799                                                                                       | 157.799     | 0                               | 157.762      | 0.037                           |
| 5        | 156.111                                                                                       | 156.084     | 0.027                           | 156.055      | 0.056                           |
| 6        | 155.857                                                                                       | 155.860     | -0.003                          | 155.842      | 0.015                           |
| 7        | 152.670                                                                                       | 152.685     | -0.015                          | 152.668      | 0.002                           |
| 8        | 157.837                                                                                       | 157.861     | -0.024                          | 157.910      | -0.073                          |
| 9        | 157.208                                                                                       | 157.182     | 0.026                           | 157.192      | 0.016                           |
| 10       | 158.154                                                                                       | 158.182     | -0.028                          | 158.179      | -0.025                          |
| 11       | 155.408                                                                                       | 155.380     | 0.028                           | 155.386      | 0.022                           |

Table S9. Differences in vertical reference points obtained using ground level manual GNSS and 74 m UAV GCPs-based methods.

| CP<br>No | Vertical Datum Measurements in Meters Obtained Through Manual GNSS and UAV GCPs-Based Methods. |                |                                 |                |                                 |                |                                 |
|----------|------------------------------------------------------------------------------------------------|----------------|---------------------------------|----------------|---------------------------------|----------------|---------------------------------|
|          | GNSS                                                                                           | 5 GCPs-Based   |                                 | 6 GCPs-Based   |                                 | 8 GCPs-Based   |                                 |
|          | Ground<br>Level                                                                                | 74 m<br>Height | Difference from<br>Ground Level | 74 m<br>Height | Difference from<br>Ground Level | 74 m<br>Height | Difference from<br>Ground Level |
| 1        | 162.661                                                                                        | 162.677        | -0.016                          | 162.682        | -0.021                          | 162.679        | -0.018                          |
| 2        | 159.556                                                                                        | 159.570        | -0.014                          | 159.564        | -0.008                          | 159.577        | -0.021                          |
| 3        | 159.463                                                                                        | 160.203        | -0.740                          | 159.466        | -0.003                          | 159.458        | 0.005                           |
| 4        | 157.799                                                                                        | 157.605        | 0.194                           | 157.800        | -0.001                          | 157.815        | -0.016                          |
| 5        | 156.111                                                                                        | 156.121        | -0.010                          | 156.132        | -0.021                          | 156.177        | -0.066                          |
| 6        | 155.857                                                                                        | 155.624        | 0.233                           | 155.885        | -0.028                          | 155.912        | -0.055                          |
| 7        | 152.670                                                                                        | 152.521        | 0.149                           | 152.703        | -0.033                          | 152.685        | -0.015                          |
| 8        | 157.837                                                                                        | 158.929        | -1.092                          | 157.989        | -0.152                          | 157.841        | -0.004                          |
| 9        | 157.208                                                                                        | 157.224        | -0.016                          | 157.224        | -0.016                          | 157.328        | -0.120                          |
| 10       | 158.154                                                                                        | 158.159        | -0.005                          | 158.166        | -0.012                          | 158.165        | -0.011                          |
| 11       | 155.408                                                                                        | 155.877        | -0.469                          | 155.434        | -0.026                          | 155.433        | -0.025                          |

Table S10. Differences in vertical reference points obtained using ground level manual GNSS and 100 m UAV GCPs-based methods.

| CP No | Vertical Datum Measurements in Meters Obtained Through Manual GNSS and UAV GCPs-Based Methods. |              |                              |              |                              |              |                              |
|-------|------------------------------------------------------------------------------------------------|--------------|------------------------------|--------------|------------------------------|--------------|------------------------------|
|       | GNSS                                                                                           | 5 GCPs-Based |                              | 6 GCPs-Based |                              | 8 GCPs-Based |                              |
|       | Ground Level                                                                                   | 100 m Height | Difference from Ground Level | 100 m Height | Difference from Ground Level | 100 m Height | Difference from Ground Level |
| 1     | 162.661                                                                                        | 162.695      | -0.034                       | 162.662      | -0.001                       | 162.675      | -0.014                       |
| 2     | 159.556                                                                                        | 159.573      | -0.017                       | 159.568      | -0.012                       | 159.579      | -0.023                       |
| 3     | 159.463                                                                                        | 159.576      | -0.113                       | 159.470      | -0.007                       | 159.472      | -0.009                       |
| 4     | 157.799                                                                                        | 158.040      | -0.241                       | 157.859      | -0.060                       | 157.828      | -0.029                       |
| 5     | 156.111                                                                                        | 156.137      | -0.026                       | 156.127      | -0.016                       | 156.117      | -0.006                       |
| 6     | 155.857                                                                                        | 155.742      | 0.115                        | 155.884      | -0.027                       | 155.880      | -0.023                       |
| 7     | 152.670                                                                                        | 152.157      | 0.513                        | 152.710      | -0.040                       | 152.702      | -0.032                       |
| 8     | 157.837                                                                                        | 157.359      | 0.478                        | 157.780      | 0.057                        | 157.816      | 0.021                        |
| 9     | 157.208                                                                                        | 157.216      | -0.008                       | 157.207      | 0.001                        | 157.209      | -0.001                       |
| 10    | 158.154                                                                                        | 158.172      | -0.018                       | 158.156      | -0.002                       | 158.170      | -0.016                       |
| 11    | 155.408                                                                                        | 155.030      | 0.378                        | 155.432      | -0.024                       | 155.437      | -0.029                       |

Table S11. Vertical reference point differences in smaller-scale RTK/PPK surveys.

| CP No | Vertical Datum Measurements in Meters Obtained Through Manual GNSS and UAV RTK/PPK Methods. |                  |                              |                  |                              |              |                              |
|-------|---------------------------------------------------------------------------------------------|------------------|------------------------------|------------------|------------------------------|--------------|------------------------------|
|       | GNSS                                                                                        | 3 GCPs-Based RTK |                              | 5 GCPs-Based RTK |                              | PPK          |                              |
|       | Ground Level                                                                                | 100 m Height     | Difference from Ground Level | 100 m Height     | Difference from Ground Level | 100 m Height | Difference from Ground Level |
| 1     | 162.661                                                                                     | 162.669          | -0.008                       | 162.662          | -0.001                       | -            | -                            |
| 2     | 159.556                                                                                     | 159.571          | -0.015                       | 159.567          | -0.011                       | -            | -                            |
| 3     | 159.463                                                                                     | 159.453          | 0.010                        | 159.474          | -0.011                       | -            | -                            |
| 4     | 157.799                                                                                     | 157.833          | -0.034                       | 157.832          | -0.033                       | -            | -                            |
| 5     | 156.111                                                                                     | 156.091          | 0.020                        | 156.106          | 0.005                        | -            | -                            |
| 7     | 152.670                                                                                     | 152.662          | 0.008                        | 152.691          | -0.021                       | -            | -                            |
| 10    | 158.154                                                                                     | 158.162          | -0.008                       | 158.256          | -0.102                       | -            | -                            |
| 11    | 155.408                                                                                     | 155.412          | -0.004                       | 155.421          | -0.013                       | -            | -                            |
| 1*    | 156.523                                                                                     | -                | -                            | -                | -                            | 156.482      | 0.041                        |
| 2*    | 154.222                                                                                     | -                | -                            | -                | -                            | 154.190      | 0.032                        |
| 3*    | 156.363                                                                                     | -                | -                            | -                | -                            | 156.348      | 0.015                        |
| 4*    | 155.965                                                                                     | -                | -                            | -                | -                            | 155.978      | -0.013                       |
| 5*    | 152.203                                                                                     | -                | -                            | -                | -                            | 152.187      | 0.016                        |

\*Separately measured control points.

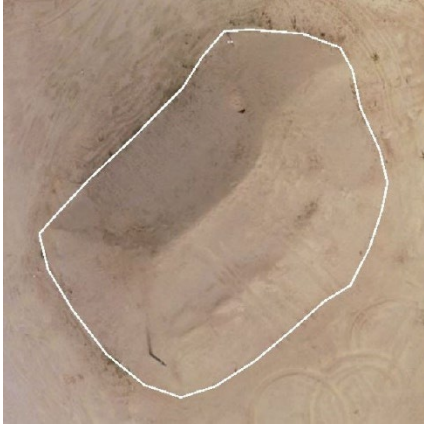

(a)

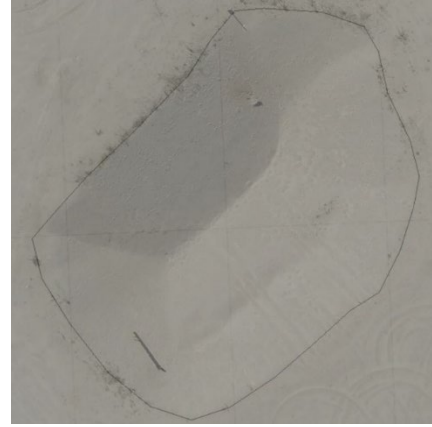

(b)

**Figure S1.** Example of the boundaries used for stockpiles volume comparison. Stockpile number 3: (a) the view in Trimble Stratus and (b) the view in ContextCapture with 50% mesh transparency.

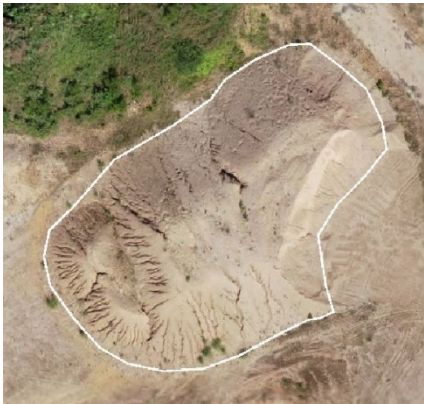

(a)

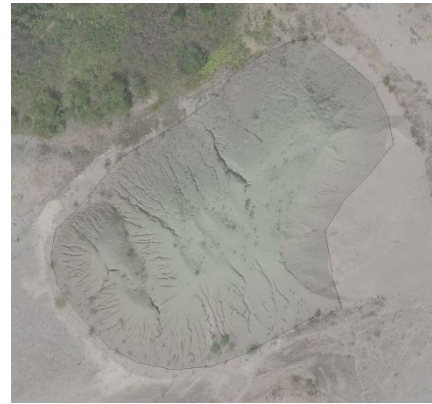

(b)

**Figure S2.** Example of the boundaries used for stockpiles volume comparison. Stockpile number 15: (a) the view in Trimble Stratus and (b) the view in ContextCapture with 50% mesh transparency.

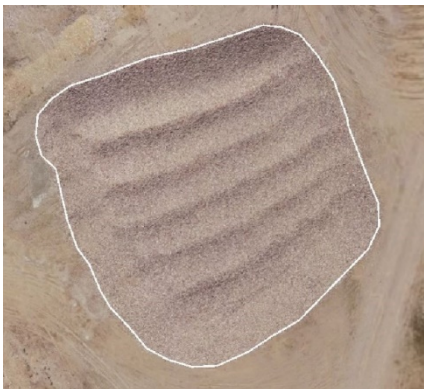

(a)

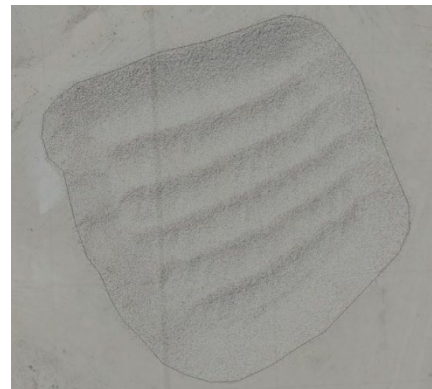

(b)

**Figure S3.** Example of the boundaries used for stockpiles volume comparison. Stockpile number 16: (a) the view in Trimble Stratus and (b) the view in ContextCapture with 50% mesh transparency.
